# Supplementary material for: Fe3O4 nanoplates anchored on Ti3C2Tx MXene with enhanced pseudocapacitive and electrocatalytic properties
Source: Royal Society of Chemistry journal article supplement (doi:10.1039/d1nr04383h), 2021-01-01
Supplement: d1nr04383h1.pdf [file d1nr04383h1.pdf]

## Supporting Information

### **Fe<sub>3</sub>O<sub>4</sub> Nanoplates Anchored on the Ti<sub>3</sub>C<sub>2</sub>T<sub>x</sub> MXene with Enhanced Pseudocapacitive and Electrocatalytic Properties**

*Lu Zhang, ‡ Zhuo Wang, ‡ Wenxiao Chen, Ruiwen Yuan, Ke Zhan, Min Zhu, Junhe Yang, and Bin*

*Zhao\**

School of Materials Science and Engineering, University of Shanghai for Science and  
Technology, Shanghai 200093, China.

#### **Corresponding Author**

\*E-mail: zhaobin@usst.edu.cn

## The Computational equations

According to the equation (1), the gravimetric specific capacitance of an electrode material can be expressed as follow:

$$C_g = \frac{I\Delta t}{m\Delta V} \quad (1)$$

where  $I$  is the current density,  $t$  is the discharge time,  $m$  is the mass of the active material and  $V$  is the potential window.

The charge/discharge process is dominated by diffusion or capacitance behavior can be qualitatively analyzed by the following equations:

$$i = ab^v \quad (2)$$

$$\log i = b \times \log v + \log a \quad (3)$$

where  $i$  is the current,  $v$  is the scan rate and  $a$  is a constant. The slope  $b$  is obtained by fitting  $\log i$  and  $\log v$ . If the  $b$  value is close to 0.5, this suggests a linear diffusion-controlled process, while values close to 1.0 represent a capacitive-controlled behaviour.

The contribution rate of capacitance at a specific scan rate can be quantitatively calculated by the following equation:

$$i(V) = k_1v + k_2v^{1/2} \quad (4)$$

where the capacitive contribution ( $k_1v$ ) and the linear diffusion-controlled contribution ( $k_2v^{1/2}$ ).

The overpotential ( $\eta$ ) was calculated using the following equation:

$$\eta(V) = E(V \text{ vs. RHE}) - 1.23 \text{ V} \quad (5)$$

considering  $O_2/H_2O$  equilibrium at 1.23 V vs. RHE.

Tafel equation was derived by fitting the linear portion of the tafel plots and the tafel slope was used to evaluate of the OER activities of the investigated catalysts:

$$\eta(V) = b \log(j/j_0) \quad (6)$$

where  $\eta$  is the overpotential,  $b$  is the Tafel slope,  $j$  is the current density and  $j_0$  is the exchange current density.

**Table S1** Physicochemical parameters of the MXene-Fe composites.

| Samples    | BET (m <sup>2</sup> g <sup>-1</sup> ) | D (nm) | V (cm <sup>3</sup> g <sup>-1</sup> ) |
|------------|---------------------------------------|--------|--------------------------------------|
| MXene-Fe-1 | 12.2                                  | 11.38  | 0.034                                |
| MXene-Fe-2 | 41.3                                  | 6.84   | 0.104                                |
| MXene-Fe-3 | 61.8                                  | 7.74   | 0.176                                |
| MXene-Fe-4 | 44.8                                  | 8.83   | 0.113                                |

**Table S2** Summary of the specific capacitance, overpotential, Tafel slope and  $C_{dl}$  for different composites measured in 1.0 M KOH.

| Samples                                       | Specific capacitance (F g <sup>-1</sup> ) | $\eta_{10}$ (mV) | Tafel slope (mV dec <sup>-1</sup> ) | $C_{dl}$ (mF cm <sup>-2</sup> ) |
|-----------------------------------------------|-------------------------------------------|------------------|-------------------------------------|---------------------------------|
| Ti <sub>3</sub> C <sub>2</sub> T <sub>x</sub> | 46.0                                      | 470              | 71.6                                | 0.35                            |
| MXene-Fe-1                                    | 170.6                                     | 340              | 68.0                                | 0.735                           |
| MXene-Fe-2                                    | 289.0                                     | 300              | 65.1                                | 0.785                           |
| MXene-Fe-3                                    | 368.0                                     | 290              | 76.1                                | 0.86                            |
| MXene-Fe-4                                    | 172.6                                     | 470              | 133.0                               | 0.795                           |

**Table S3.** Comparison of supercapacitive performance of the  $\text{Ti}_3\text{C}_2\text{T}_x$ -Fe composite and the related  $\text{Ti}_3\text{C}_2\text{T}_x$ -based electrodes in literatures.

| Samples                                                                | Voltage window    | Electrolyte    | Specific capacitance                                                                               | Ref.             |
|------------------------------------------------------------------------|-------------------|----------------|----------------------------------------------------------------------------------------------------|------------------|
| <b><math>\text{Ti}_3\text{C}_2\text{T}_x/\text{Fe-3}</math></b>        | <b>-1.1~0.3 V</b> | <b>1 M KOH</b> | <b>1 A g<sup>-1</sup>, 368 F g<sup>-1</sup></b>                                                    | <b>This work</b> |
| $\text{Ti}_3\text{C}_2$ -foam                                          | -1~-0.5 V         | 1 M KOH        | 5 mV s <sup>-1</sup> , 122.7 F g <sup>-1</sup>                                                     | S1               |
| $\text{V}_2\text{C}$                                                   | -1.1~-0.6 V       | 1 M KOH        | 2 mV s <sup>-1</sup> , 184 F g <sup>-1</sup>                                                       | S2               |
| $\text{Ti}_3\text{C}_2\text{T}_x$                                      | -0.8~0 V          | 6 M KOH        | 1 A g <sup>-1</sup> , 197 F g <sup>-1</sup>                                                        | S3               |
| $\text{Fe}_3\text{O}_4$                                                | -0.2~0.25 V       | 3 M KOH        | 2 mV s <sup>-1</sup> , 101 F g <sup>-1</sup>                                                       | S4               |
| $\text{MnO}_2$ - $\text{Ti}_3\text{C}_2$                               | -1~-0.4 V         | 6 M KOH        | 5 mV s <sup>-1</sup> , 140 F g <sup>-1</sup>                                                       | S5               |
| $\text{PANI@TiO}_2/\text{Ti}_3\text{C}_2\text{T}_x$                    | -1~-0.3 V         | 1 M KOH        | 1 A g <sup>-1</sup> , 108.9 F g <sup>-1</sup>                                                      | S6               |
| $\text{Ti}_3\text{C}_2\text{T}_x$ - $\text{Al}^{3+}$                   | -1~-0.4 V         | 1 M KOH        | 0.3 A g <sup>-1</sup> , 175 F g <sup>-1</sup>                                                      | S7               |
| PVP-Mn/ak $\text{Ti}_3\text{C}_2$<br>PVP-Ni/ak $\text{Ti}_3\text{C}_2$ | -1.1~-0.4 V       | 1 M KOH        | 0.3 A g <sup>-1</sup> , 154.6 F g <sup>-1</sup><br>0.3 A g <sup>-1</sup> , 167.5 F g <sup>-1</sup> | S8               |
| $\text{MoO}_3/\text{TiO}_2/\text{Ti}_3\text{C}_2\text{T}_x$            | -1~-0.3 V         | 1 M KOH        | 2 mV s <sup>-1</sup> , 162 F g <sup>-1</sup>                                                       | S9               |

**Table S4** The detailed values of impedance in Fig 6c.  $R_s$ : resistivity of solution; CPE-T: Constant phase element-T; CPE-P: Constant phase element-P;  $R_{ct}$ : resistivity of charge transfer.

| Samples    | Element  | Value        |
|------------|----------|--------------|
| MXene-Fe-1 | $R_s$    | 1.365        |
|            | CPE-T    | 0.055976     |
|            | CPE-P    | 0.62019      |
|            | $R_{ct}$ | <b>18.78</b> |
| MXene-Fe-2 | $R_s$    | 1.39         |
|            | CPE-T    | 0.030362     |
|            | CPE-P    | 0.70702      |
|            | $R_{ct}$ | <b>6.624</b> |
| MXene-Fe-3 | $R_s$    | 1.31         |
|            | CPE-T    | 0.081123     |
|            | CPE-P    | 0.55656      |
|            | $R_{ct}$ | <b>3.913</b> |
| MXene-Fe-4 | $R_s$    | 1.523        |
|            | CPE-T    | 0.024338     |
|            | CPE-P    | 0.68198      |
|            | $R_{ct}$ | <b>24.67</b> |

**Table S5** Comparison of OER performance of the  $Ti_3C_2T_x$ -Fe composite and the related  $Ti_3C_2T_x$ -based electrocatalyst in literatures.

| Samples                                                         | $\eta_{10}$   | Tofel slope (mV dec <sup>-1</sup> ) | Electrolyte    | Ref.             |
|-----------------------------------------------------------------|---------------|-------------------------------------|----------------|------------------|
| <b>Ti<sub>3</sub>C<sub>2</sub>T<sub>x</sub>-Fe-3</b>            | <b>290 mV</b> | <b>65.1</b>                         | <b>1 M KOH</b> | <b>This work</b> |
| Co-LDH@Ti <sub>3</sub> C <sub>2</sub> T <sub>x</sub>            | 340 mV        | 82                                  | 1 M KOH        | S10              |
| NiCoS/Ti <sub>3</sub> C <sub>2</sub> T <sub>x</sub>             | 360 mV        | 58                                  | 1 M KOH        | S11              |
| NiCo -LDH/Ti <sub>3</sub> C <sub>2</sub> T <sub>x</sub>         | 480 mV        | 153.1                               |                |                  |
| Ti <sub>3</sub> C <sub>2</sub> T <sub>x</sub> -CoBDC            | 410 mV        | 48.2                                | 0.1 M KOH      | S12              |
| 1T/2H MoSe <sub>2</sub> /Mxene                                  | 340 mV        | 90                                  | 1 M KOH        | S13              |
| BP/MXene                                                        | 360 mV        | 64.3                                | 1 M KOH        | S14              |
| Co <sup>3+</sup> -Ti <sub>3</sub> C <sub>2</sub> T <sub>x</sub> | 425 mV        | 63.5                                | 1 M KOH        | S15              |
| Co/N-CNTs@Ti <sub>3</sub> C <sub>2</sub> T <sub>x</sub>         | 411 mV        | 79.1                                | 0.1 M KOH      | S16              |
| CoP@Ti <sub>3</sub> C <sub>2</sub>                              | 320 mV        | 59                                  | 1 M KOH        | S17              |
| CoP/Ti <sub>3</sub> C <sub>2</sub> MXene                        | 280 mV        | 95.4                                | 1 M KOH        | S18              |
| CoFe-LDH/MXene                                                  | 319 mV        | 50                                  | 1 M KOH        | S19              |



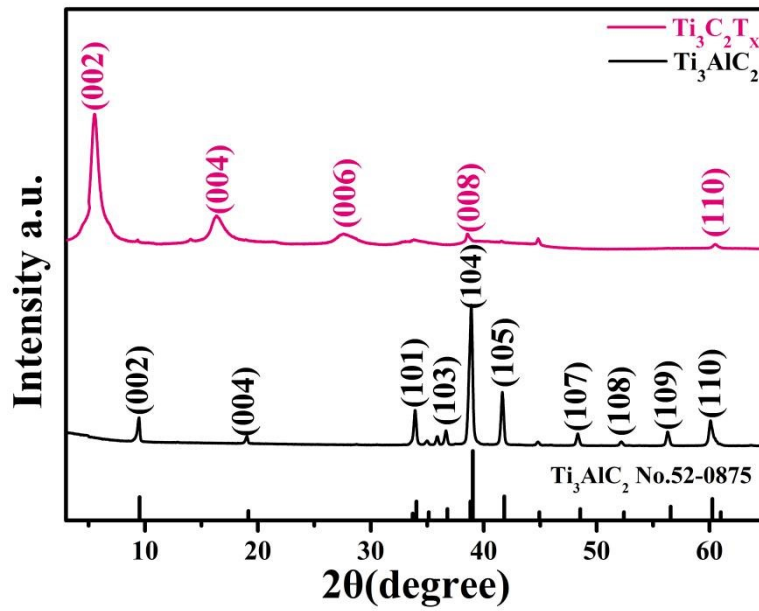

Fig. S1 XRD patterns of  $\text{Ti}_3\text{AlC}_2$  and  $\text{Ti}_3\text{C}_2\text{T}_x$  samples.

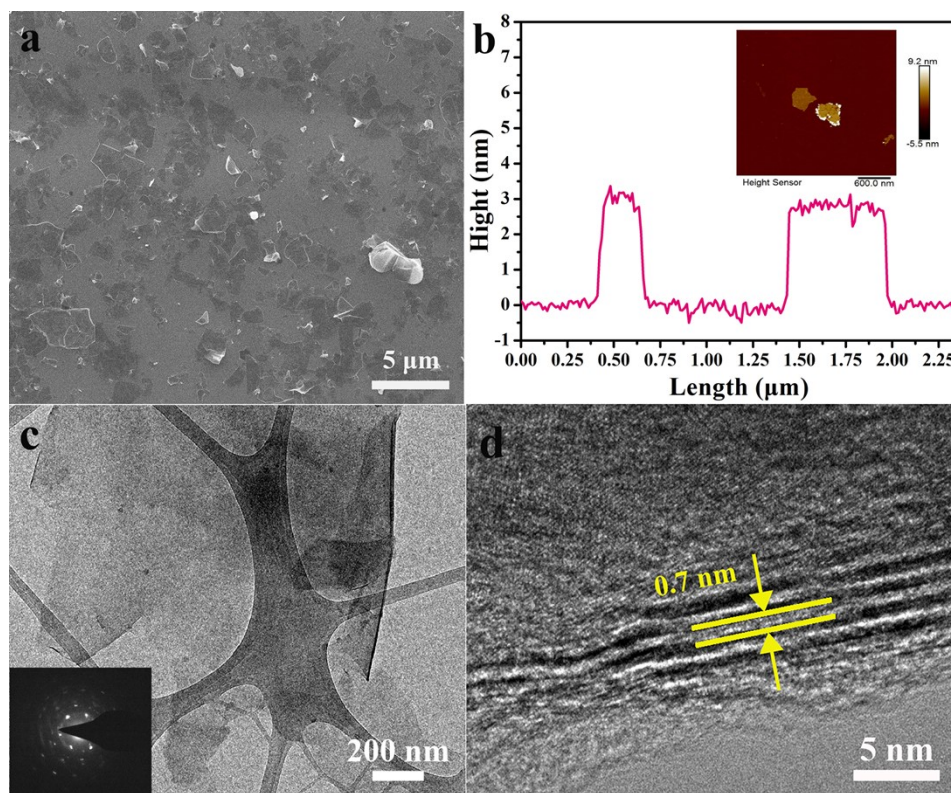

**Fig. S2** (a) SEM (b) AFM (c) TEM (the inset shows the corresponding diffraction pattern) and (d) HRTEM images of  $\text{Ti}_3\text{C}_2\text{T}_x$  nanosheet with corresponding height profile.

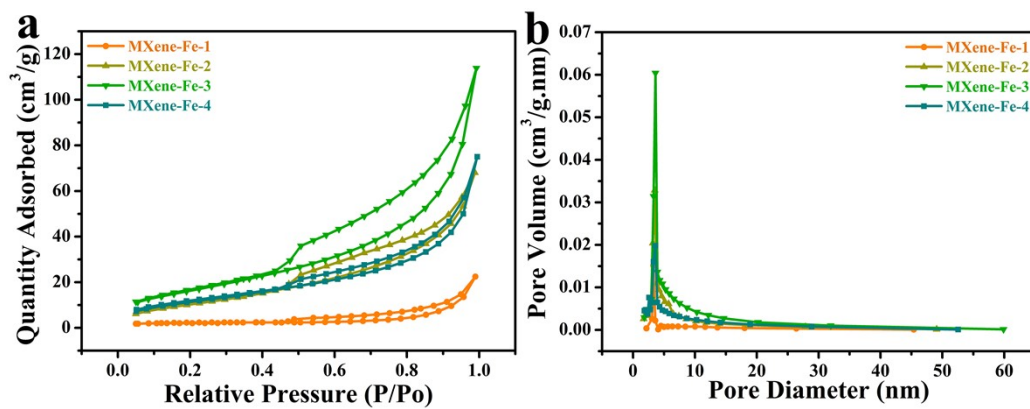

**Fig. S3** Nitrogen gas sorption isotherm at 77 K (a) and (b) corresponding pore size distribution of MXene-Fe-1, MXene-Fe-2, MXene-Fe-3 and MXene-Fe-4.

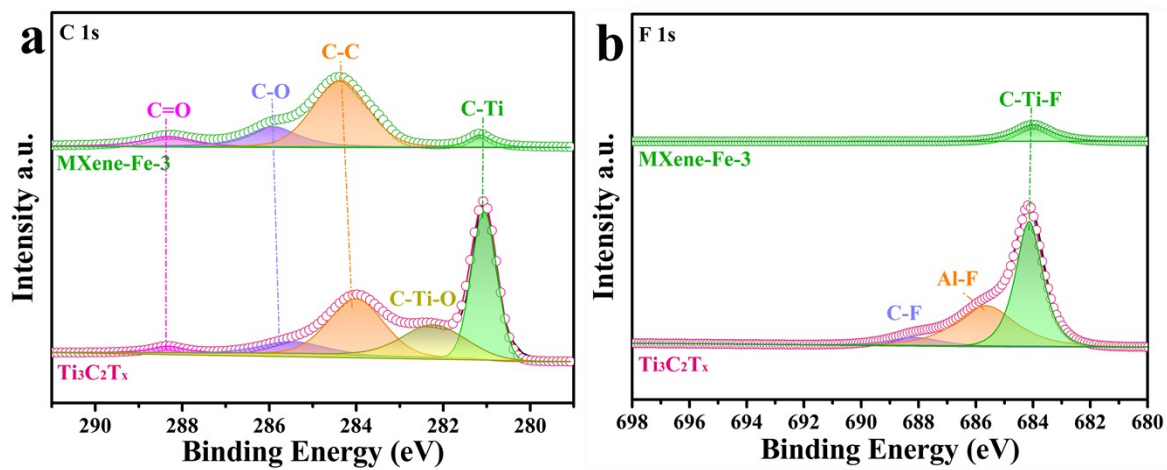

**Fig. S4** High-resolution XPS spectra for (a) C 1s, (b) F 1s of Ti<sub>3</sub>C<sub>2</sub>T<sub>x</sub> and MXene-Fe-3 samples, respectively.

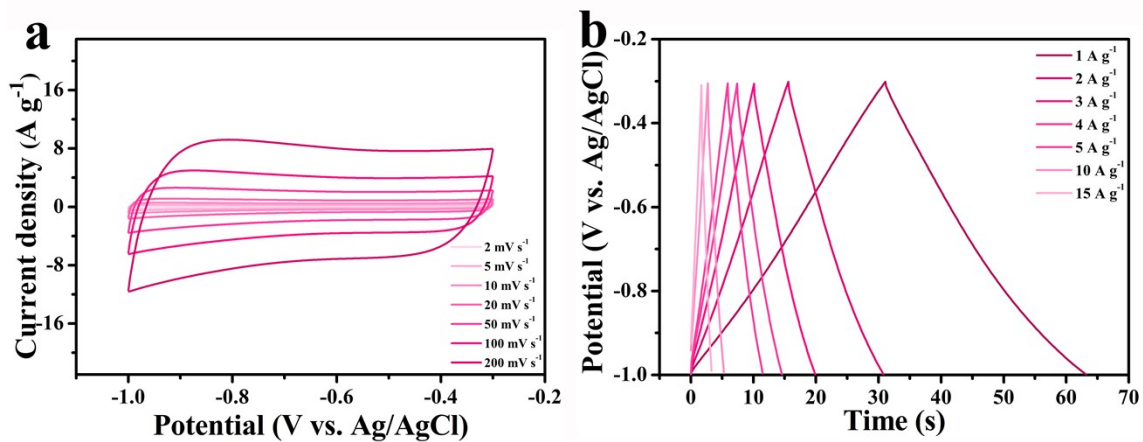

**Fig. S5** (a) CV curves of the  $\text{Ti}_3\text{C}_2\text{T}_x$  at scan rates of 2 to 200  $\text{mV s}^{-1}$  in a potential window of -1.0 ~ -0.3 V. (b) GCD curves of the  $\text{Ti}_3\text{C}_2\text{T}_x$  at current densities of 1 to 15  $\text{A g}^{-1}$  in a potential window of -1.0 ~ -0.3 V.

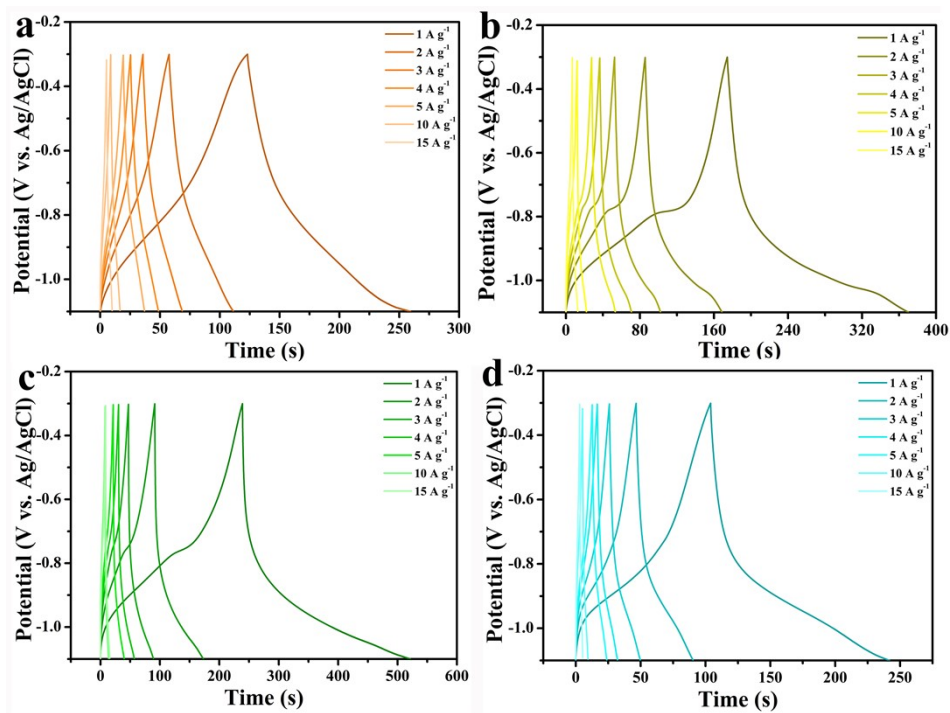

**Fig. S6** GCD curves of the (a) MXene-Fe-1, (b) MXene-Fe-2, (c) MXene-Fe-3 and (d) MXene-Fe-4 at current densities of 1 to 15 A g<sup>-1</sup> in a potential window of -1.1 ~ -0.3 V.

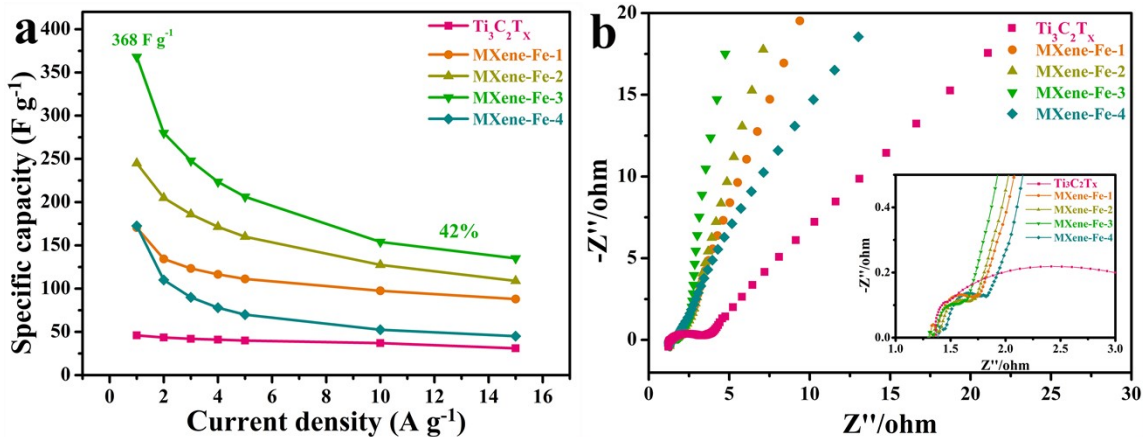

**Fig. S7** (a) Specific capacities as a function of discharge current densities calculated from the GCD curves. (b) Nyquist curves of Ti<sub>3</sub>C<sub>2</sub>T<sub>x</sub>, MXene-Fe-1, MXene-Fe-2, MXene-Fe-3 and MXene-Fe-4 electrodes, inset showing high-frequency parts of the EIS spectra for these samples.

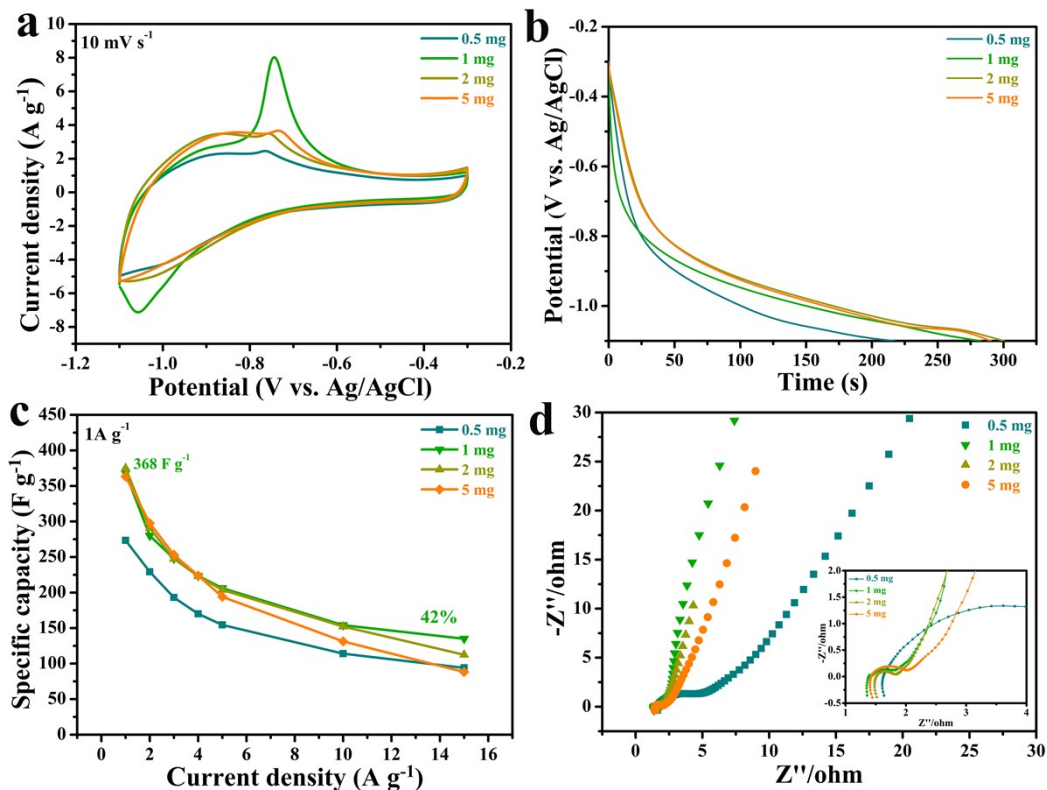

**Fig. S8** Electrochemical performance of the MXene-Fe-3 with the different mass of the active substance. (a) CV curves at  $10 \text{ mV s}^{-1}$  and (b) GCD curves at  $1 \text{ A g}^{-1}$ , (c) Specific capacities as a function of discharge current densities calculated from the GCD curves and (d) Nyquist curves, inset showing high-frequency parts of the EIS spectra for these samples.



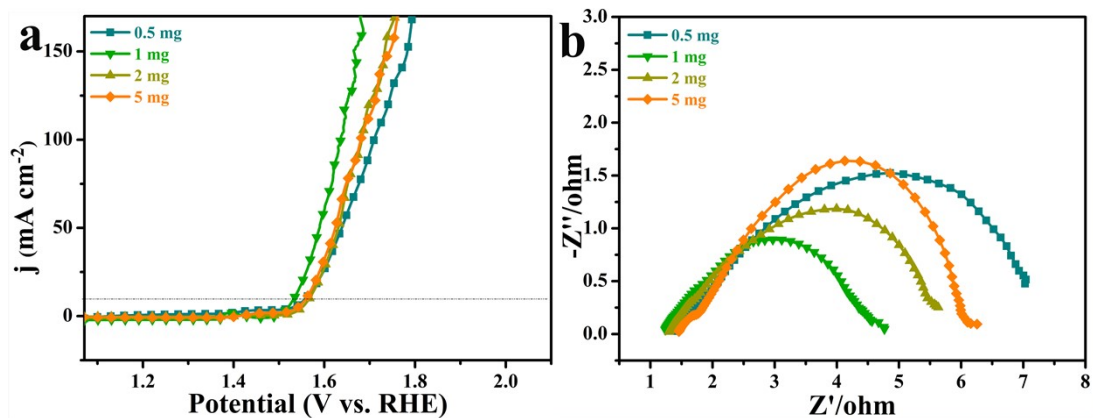

**Fig. S9** Electro-catalytic property tests of the MXene-Fe-3 with the different mass of the active substance. (a) LSV curves and (b) Nyquist plots of the above electrodes measured at a potential of 1.50 V vs. RHE.

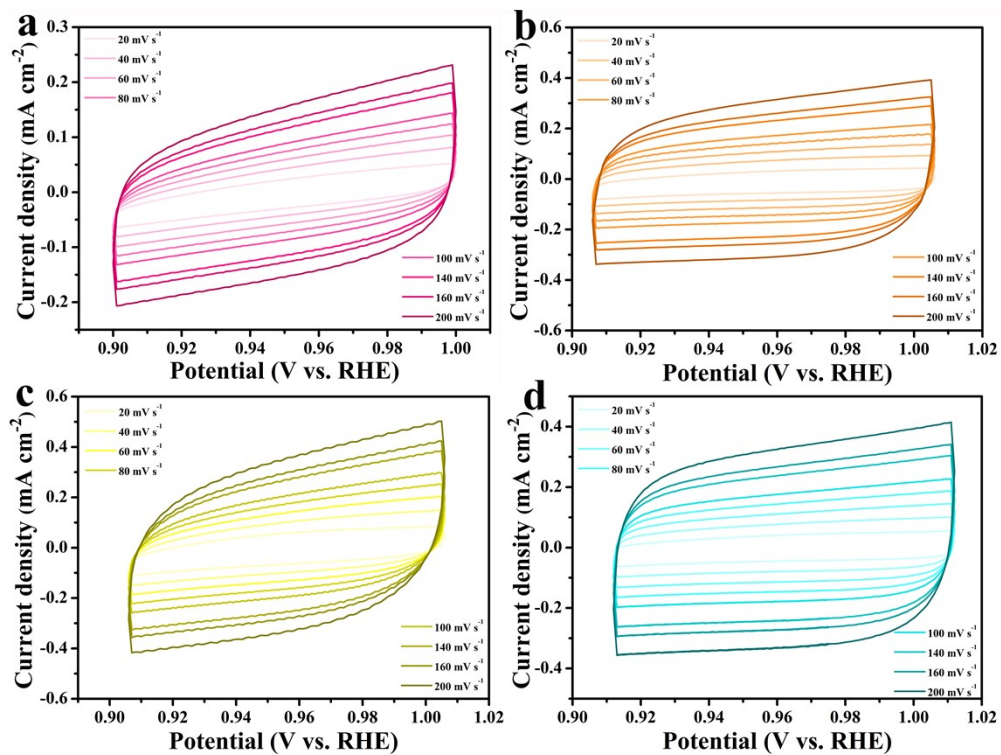

**Fig. S10** Cyclic voltammograms (CVs) of (a)  $\text{Ti}_3\text{C}_2\text{T}_x$ , (b) MXene-Fe-1, (c) MXene-Fe-2, and (d) MXene-Fe-4 at various scan rates.

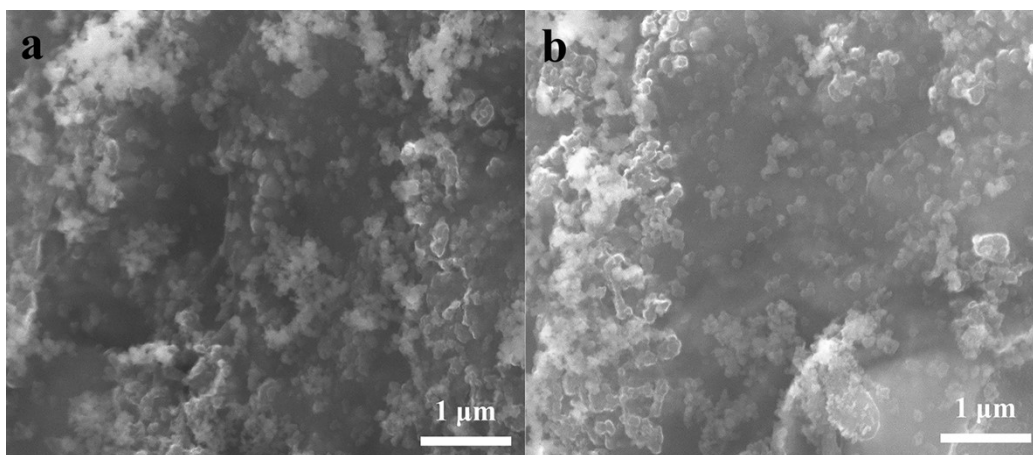

**Fig. S11** SEM image of MXene-Fe-3 after OER stability test in 1 M KOH.

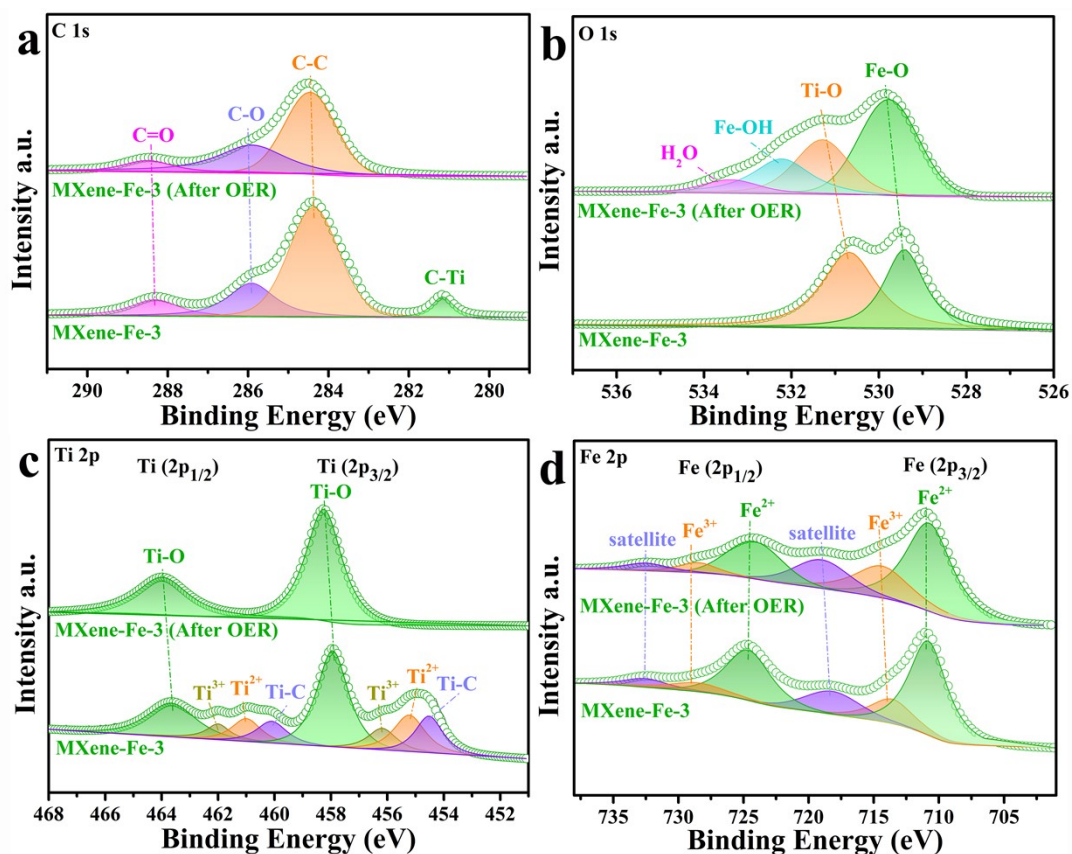

**Fig. S12** High resolution XPS spectra of the MXene-Fe-3 before and after OER test: (a) C 1s, (b) O 1s, (c) Ti 2p and (d) Fe 2p.

## References

- S1 L. Shi, S. Lin, L. Li, W. Wu, L. Wu, H. Gao and X. Zhang, *Ceramics International*, 2018, **44**, 13901-13907.
- S2 Q. Shan, X. Mu, M. Alhabeab, C. E. Shuck, D. Pang, X. Zhao, X.-F. Chu, Y. Wei, F. Du, G. Chen, Y. Gogotsi, Y. Gao and Y. Dall'Agnese, *Electrochemistry Communications*, 2018, **96**, 103-107.
- S3 S. Venkateshalu and A. N. Grace, *Electrochimica Acta*, 2020, **341**, 136035.
- S4 M. L. Aparna, A. N. Grace, P. Sathyanarayanan and N. K. Sahu, *Journal of Alloys and Compounds*, 2018, **745**, 385-395.
- S5 Y. Tang, J. Zhu, C. Yang and F. Wang, *Journal of Alloys and Compounds*, 2016, **685**, 194-201.
- S6 X. Lu, J. Zhu, W. Wu and B. Zhang, *Electrochimica Acta*, 2017, **228**, 282-289.
- S7 Y. Li, Y. Deng, J. Zhang, Y. Han, W. Zhang, X. Yang, X. Zhang and W. Jiang, *Nanoscale*, 2019, **11**, 21981-21989.
- S8 W. Zhang, J. Zhang, Y. Li and X. Yang, *Ceramics International*, 2020, **46**, 15492-15501.
- S9 Q. Zhao, J. Zhu, X. Lu, W. Zhou and X. Li, *Journal of Alloys and Compounds*, 2018, **767**, 264-269.
- S10 M. Benchakar, T. Bilyk, C. Garnerio, L. Loupias, C. Morais, J. Pacaud, C. Canaff, P. Chartier, S. Morisset, N. Guignard, V. Mauchamp, S. Célérier and A. Habrioux, *Advanced Materials Interfaces*, 2019, **6**, 1901328.
- S11 H. Zou, B. He, P. Kuang, J. Yu and K. Fan, *ACS applied materials & interfaces*, 2018, **10**, 22311-22319.
- S12 L. Zhao, B. Dong, S. Li, L. Zhou, L. Lai, Z. Wang, S. Zhao, M. Han, K. Gao, M. Lu, X. Xie, B. Chen, Z. Liu, X. Wang, H. Zhang, H. Li, J. Liu, H. Zhang, X. Huang and W. Huang, *ACS nano*, 2017, **11**, 5800-5807.
- S13 N. Li, Y. Zhang, M. Jia, X. Lv, X. Li, R. Li, X. Ding, Y.-Z. Zheng and X. Tao, *Electrochimica Acta*, 2019, **326**, 134976.
- S14 X.-D. Zhu, Y. Xie and Y.-T. Liu, *Journal of Materials Chemistry A*, 2018, **6**, 21255-21260.
- S15 S. Y. Pang, Y. T. Wong, S. Yuan, Y. Liu, M. K. Tsang, Z. Yang, H. Huang, W. T. Wong and J. Hao, *Journal of the American Chemical Society*, 2019, **141**, 9610-9616.

- S16 Y. Zhang, H. Jiang, Y. Lin, H. Liu, Q. He, C. Wu, T. Duan and L. Song, *Advanced Materials Interfaces*, 2018, **5**, 1800392.
- S17 L. Yan, B. Zhang, S. Wu and J. Yu, *Journal of Materials Chemistry A*, 2020, **8**, 14234-14242.
- S18 L. Xiu, Z. Wang, M. Yu, X. Wu and J. Qiu, *ACS nano*, 2018, **12**, 8017-8028.
- S19 C. Hao, Y. Wu, Y. An, B. Cui, J. Lin, X. Li, D. Wang, M. Jiang, Z. Cheng and S. Hu, *Materials Today Energy*, 2019, **12**, 453-462.
